# Supplementary material for: Free-radical polymerization of 2-hydroxyethyl methacrylate (HEMA) supported by a high electric field
Source: Royal Society of Chemistry journal article supplement (doi:10.1039/d2py00320a), 2022-01-01
Supplement: d2py00320a1.pdf [file d2py00320a1.pdf]

## Supporting Information

# Free-radical polymerization of 2-hydroxyethyl methacrylate (HEMA) supported by the high electric field

Wenkang Tu,<sup>1,2,3</sup> Paulina Maksym,<sup>1,2,4</sup> Kamil Kaminski,<sup>1,2</sup> Katarzyna Chat,<sup>1,2</sup> and Karolina Adrjanowicz<sup>1,2\*</sup>

<sup>1</sup> *Institute of Physics, University of Silesia, 75 Pulku Piechoty 1, 41-500 Chorzow, Poland*

<sup>2</sup> *Silesian Center for Education and Interdisciplinary Research (SMCEBI), 75 Pulku Piechoty 1a, 41-500 Chorzow, Poland*

<sup>3</sup> *College of Mechatronics and Control Engineering, Shenzhen University, Shenzhen 518060, China*

<sup>4</sup> *Institute of Materials Engineering, University of Silesia, 75 Pulku Piechoty 1a, 41-500 Chorzow, Poland*

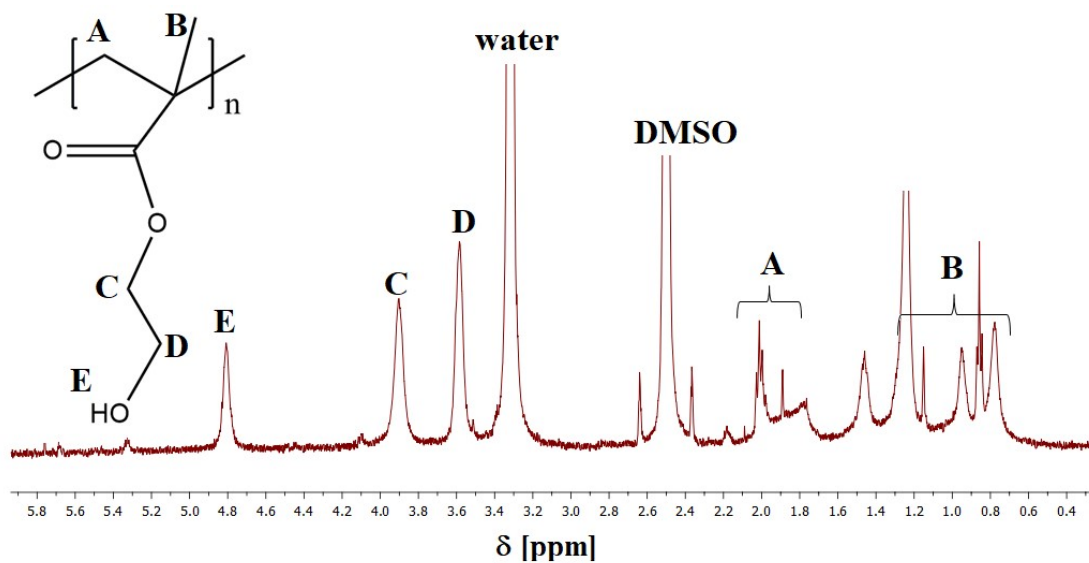

Figure S1 <sup>1</sup>H NMR spectrum of PHEMA produced in the presence of high electric field (E=140 kV/cm)

<sup>1</sup>H-NMR (CDCl<sub>3</sub>): δ=4.90 ppm (CH<sub>2</sub>-CH<sub>2</sub>-OH); δ=4.01 ppm (CO-CH<sub>2</sub>-CH<sub>2</sub>-OH) δ=3.85 ppm (CH<sub>2</sub>-CH<sub>2</sub>-OH); δ=1.80-2.00 ppm (-CH<sub>2</sub>-C(-CH<sub>3</sub>)-) δ=0.70-1.10 (CH<sub>2</sub>-C(-CH<sub>3</sub>)-C(=O))

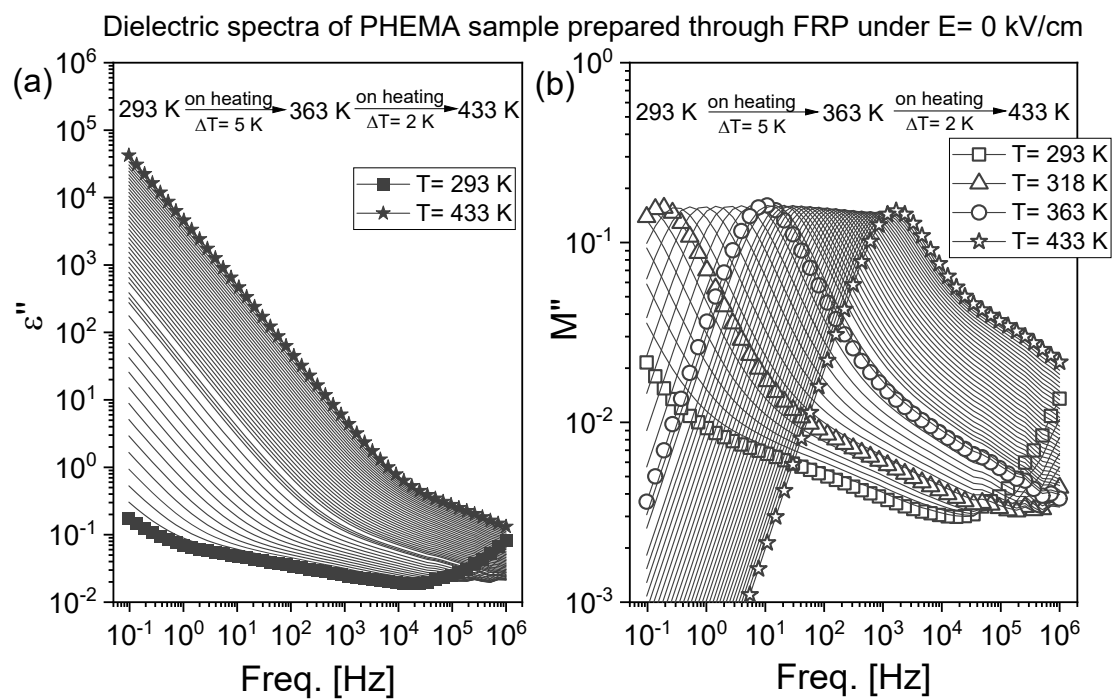

Figure S2 Dielectric loss  $\epsilon''$  (a) and electrical loss modulus  $M''$  (b) spectra for a PHEMA sample in a temperature region between 293 K and 433 K. The tested sample is obtained through free radical polymerization of HEMA under an electric field of  $E = 0$  kV/cm.

Dielectric spectra of PHEMA sample prepared through FRP under  $E= 60 \text{ kV/cm}$

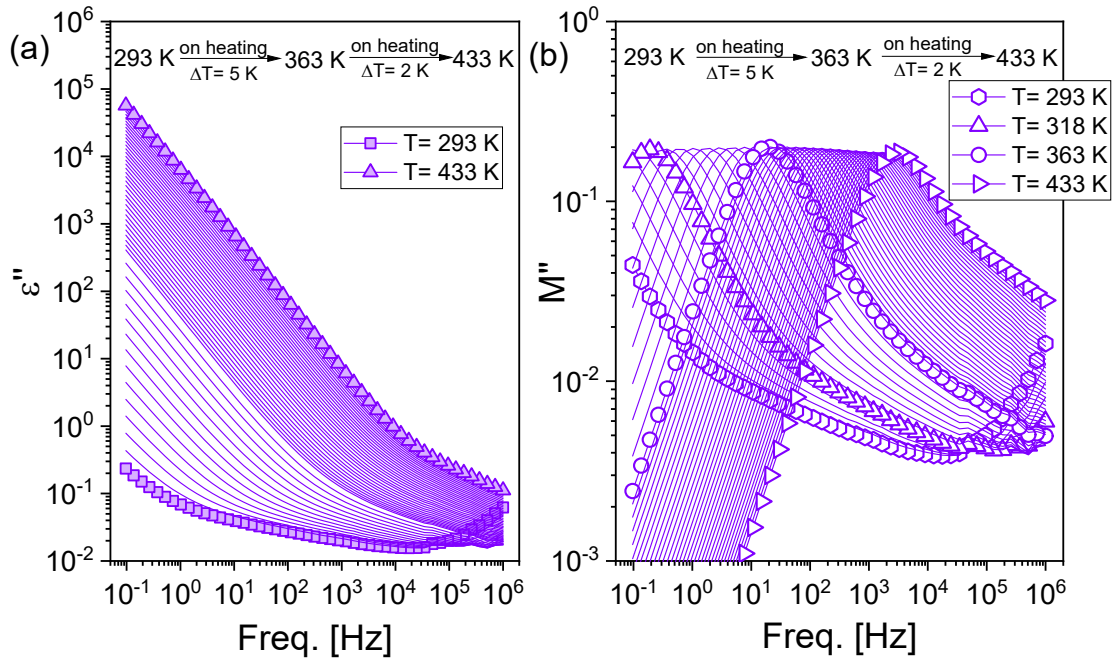

Figure S3 Dielectric loss  $\epsilon''$  (a) and electrical loss modulus  $M''$  (b) spectra for a PHEMA sample in a temperature region between 293 K and 433 K. The tested sample is obtained through free radical polymerization of HEMA under an electric field of  $E= 60 \text{ kV/cm}$ .
